1 **Modelling effects of water regulation on the population viability**  
2 **of threatened amphibians**

3 Rupert Mathwin<sup>1</sup>, Skye Wassens<sup>2</sup>, Matthew S. Gibbs<sup>3,4</sup>, Jeanne Young<sup>5</sup>, Qifeng Ye<sup>5,6</sup>, Frédéric  
4 Saltré<sup>1,7</sup>, Corey J.A. Bradshaw<sup>1,7</sup>

5 **1** Global Ecology *Partuyarta Ngadluku Wardli Kuu*, College of Science and Engineering, Flinders  
6 University, PO Box 2100, Tarndanya (Adelaide), South Australia 5001

7 **2** School of Environmental Sciences, Charles Sturt University, PO Box 789, Albury, New South  
8 Wales 2640

9 **3** School of Civil, Environmental and Mining Engineering, The University of Adelaide, Adelaide,  
10 South Australia 5005

11 **4** Department for Environment and Water, GPO Box 2384, Adelaide, 5001 South Australia 5000

12 **5** College of Science and Engineering, Flinders University, PO Box 2100, Adelaide, South Australia  
13 5001, Australia

14 **6** South Australian Research and Development Institute, 2 Hamra Ave, West Beach, South Australia  
15 5024

16 **7** ARC Centre of Excellence for Australian Biodiversity and Heritage, EpicAustralia.org.au

17

18 **Corresponding Author:** Rupert Mathwin

19 rupert.mathwin.ecology@gmail.com

20 Global Ecology, College of Science and Engineering, Flinders University, PO Box 2100, Adelaide,  
21 South Australia 5001

22

23

24

25

26 *Abstract*

- 27 1. The regulation of river systems alters hydrodynamics and often reduces lateral  
28 connectivity between river channels and floodplains. For taxa such as frogs that rely on  
29 floodplain wetlands to complete their lifecycle, decreasing inundation frequency can  
30 reduce recruitment and increase the probability of local extinction.
- 31 2. We virtually reconstructed the inundation patterns of wetlands under natural and  
32 regulated flow conditions and built stochastic population models to quantify the  
33 probability of local extinction under different inundation scenarios. Specifically, we  
34 explored the interplay of inundation frequency, habitat size, and successive dry years on  
35 the local extinction probability of the threatened southern bell frog *Litoria raniformis* in  
36 the Murray River floodplains of South Australia. We hypothesised that the changes in  
37 wetland inundation resulting from river regulation are driving the decline of *L. raniformis*  
38 in this system.
- 39 3. Since river regulation began in the 1920s, the inundation frequency of many reliable  
40 breeding habitats has decreased to a point where they no longer support local populations.  
41 Increasing successive dry years drives the probability of local extinction, particularly in  
42 smaller wetlands. Larger wetlands and those with more frequent average inundation are  
43 less susceptible to these effects.
- 44 4. *Synthesis and Applications.* Although the availability of suitable habitats has reduced,  
45 environmental water provision is a promising tool to mitigate the negative impacts of  
46 river regulation on amphibian populations. Our modelling approach can be used to  
47 prioritise the delivery of environmental water (through pumping or the operation of flow-  
48 regulating structures) to minimise the probability of local extinction in *L. raniformis* and  
49 potentially many other frog species. By quantifying the extinction risk of amphibian  
50 populations, we can strategically manage environmental water to reduce successive  
51 catastrophic breeding failures and increase the probability of persistence.

52

53 *Keywords*

54 amphibian, environmental water provision, frog, hydroperiod, Leslie matrix, *Litoria*  
55 *raniformis*, river regulation, stochastic population model

56

## 57 **Introduction**

58 The global decline of amphibians (Blaustein & Wake 1990; Stuart *et al.* 2004) is stark, with  
59 the most recent figures showing 41% of assessed species are threatened with extinction  
60 (IUCN 2020). Furthermore, extinctions and declines are projected to increase through the 21<sup>st</sup>  
61 Century as the interactive drivers of extinction increase in intensity (Hof *et al.* 2011). Human  
62 modifications of wetland networks via river regulation can reduce lateral connectivity and the  
63 ecological function of wetland habitats (Castello & Macedo 2016) that are essential breeding  
64 and nursery areas for many amphibian species. This can change amphibian community  
65 structure and cause local extinctions (Wassens & Maher 2011).

66 The negative consequences of river regulation on amphibians are predicted to increase  
67 as climate change progressively overtakes land use (Narins & Meenderink 2014) as the main  
68 driver of amphibian richness patterns and species loss (Newbold 2018). Aridification due to  
69 climate change can reduce the availability of breeding habitats resulting in reduced species  
70 richness (McMenamin, Hadly & Wright 2008), and the combination of aridification and  
71 increasing water consumption are likely to reduce the availability of freshwater habitats  
72 further in some regions (Miller *et al.* 2018).

73 Manipulating water resources can help alleviate the effects of declining water  
74 availability and support amphibian recruitment (Shoo *et al.* 2011; Smith, Meredith &  
75 Sutherland 2019; Mathwin *et al.* 2020). Techniques for manipulating water to benefit  
76 amphibians vary in their approach and success (Mathwin *et al.* 2020), but the best-supported  
77 approach is the provision of water to breeding habitats to match the larval requirements of the  
78 target species ('environmental water provision'). This is because enhancing survival through  
79 breeding and early life stages can stabilise populations (Griffiths & Pavajeau 2008). The  
80 targeted delivery of environmental water is a common practice today (Kennen, Stein & Webb  
81 2018) and could become necessary to conserve some species (Greenwood *et al.* 2016),

82 especially those with limited phenotypic plasticity or those near the edge of their ecological  
83 niche (Grant, Miller & Muths 2020).

84 Australia's Murray-Darling Basin provides a model system to examine this process.  
85 The catchment is heavily regulated and up to 61% of total flow is extracted for consumptive  
86 use (CSIRO 2008). This has reduced the number and function of wetlands (Gell & Reid  
87 2014), resulting in the decline of water-dependent taxa (including the southern bell frog,  
88 *Litoria raniformis*) (Clemann & Gillespie 2012). In response to systemic environmental  
89 degradation, federal legislation mandates interventions aimed at restoring ecological function  
90 (Docker & Robinson 2014), including environmental water provision for species recovery.

91 In this paper, we explore hydro-ecological thresholds and generate guidelines for  
92 environmental water provision to benefit amphibians by constructing stochastic, hydro-  
93 ecological population models. We hypothesise that the reduced frequency of wetland  
94 inundation resulting from river regulation is driving local extinction events of *L. raniformis* in  
95 the Murray River of South Australia. We hypothesise that larger wetlands and wetlands with  
96 higher average inundation are less susceptible to local extinction during successive dry years.  
97 We posit that the probability of local extinction can be reduced by environmental water  
98 provisions that decrease the number of successive years without recruitment. Based on these  
99 results, we argue that stochastic population models provide a sound approach for quantifying  
100 local extinction risk and hence, triaging environmental water provision to at-risk populations.

101

## 102 **Materials and Methods**

### 103 *Study area*

104 The Murray-Darling Basin contains Australia's longest river system and is heavily regulated  
105 to provide water for domestic and agricultural use. Regulating structures include a series of  
106 14 main-channel weirs ('locks') that dissect the river. Our focus is 70 km of the Murray River

107 channel between Lock 3 (34° 11' 16.95" S, 140° 21' 29.65" E) and Lock 2 (34° 4' 39.31" S,  
108 139° 55' 52.81" E) and the associated wetlands and floodplains along this reach (**Figure 1**).  
109 This region receives an annual rainfall between 160 and 240 mm (semi-arid/arid), which is  
110 insufficient to fill off-channel wetlands most years. As such, all naturally occurring wetland  
111 inundation results from elevated river level.

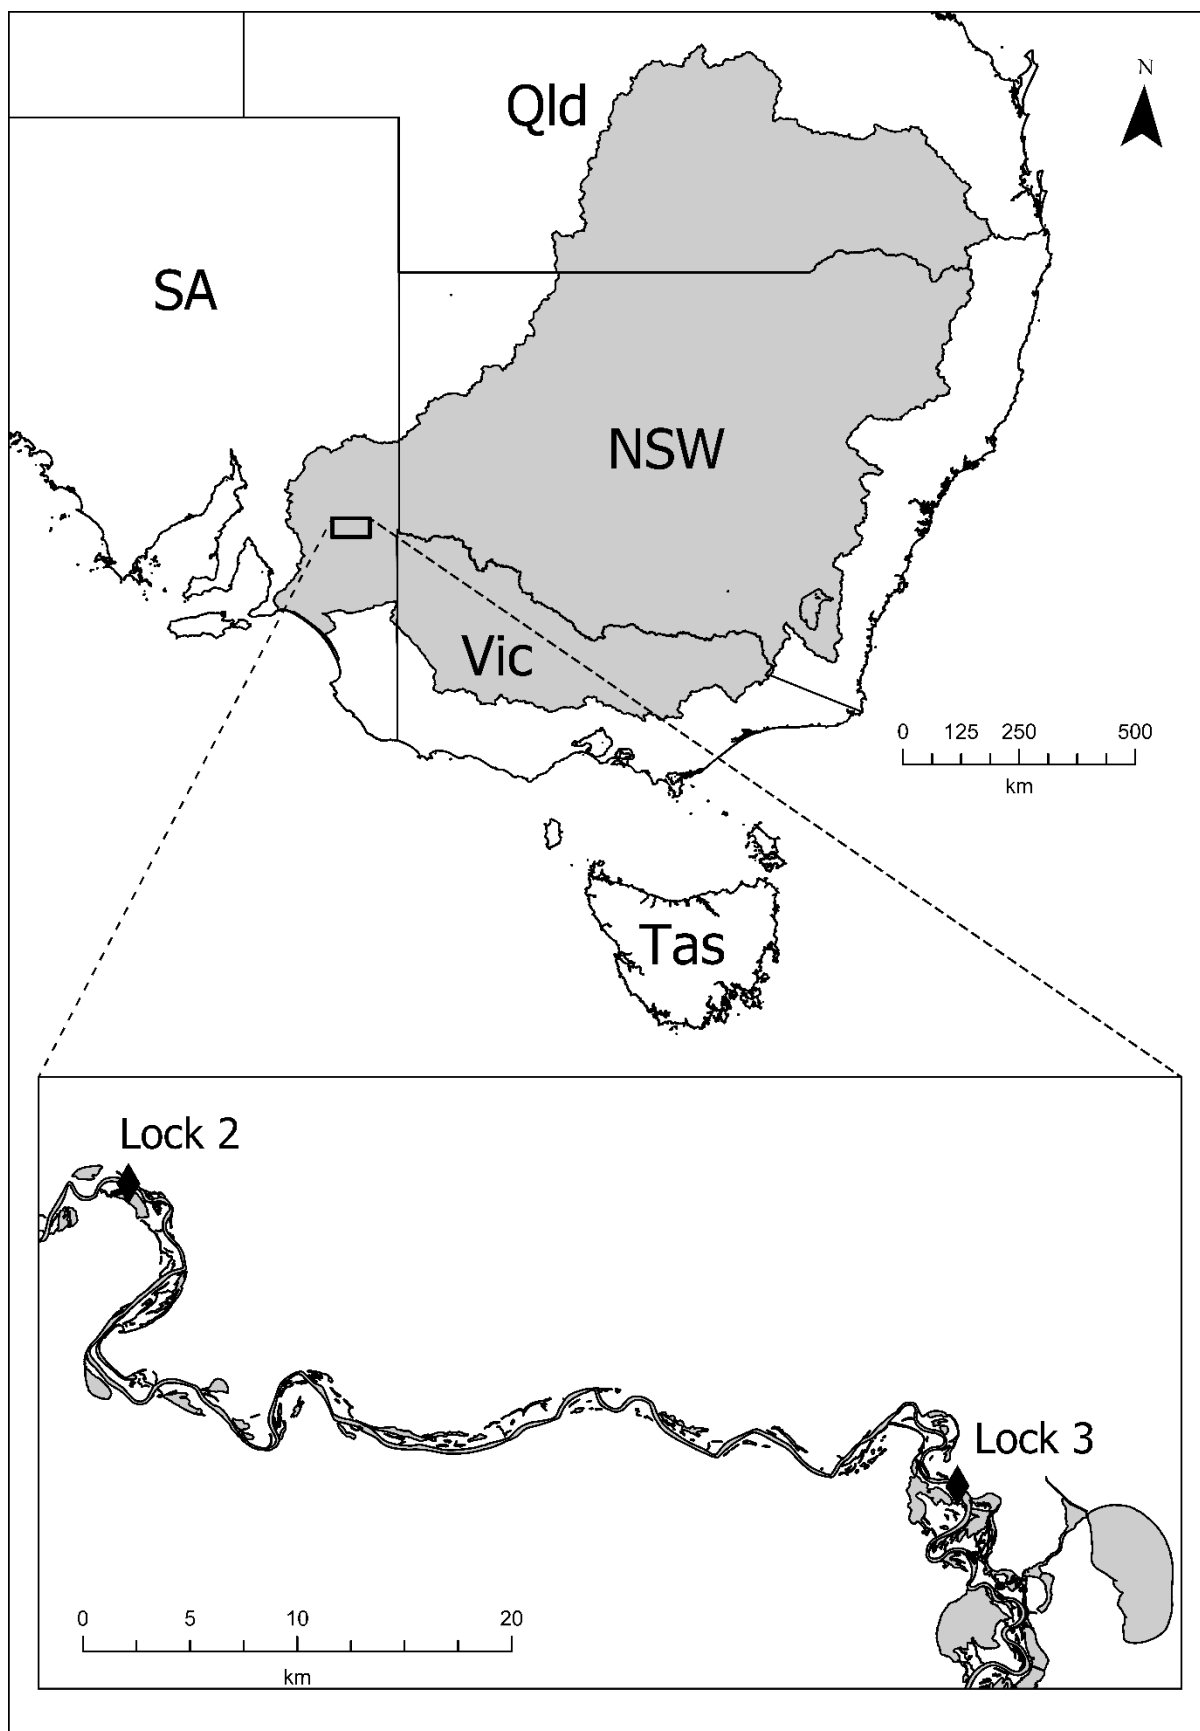

112

113

114

**Figure 1** The reach between Locks 3 and 2 is at the downstream end of the Murray-Darling catchment (shaded grey). Flow is strongly influenced by regulation and extraction throughout

115 the upstream reaches. Australian states are: SA= South Australia, Qld = Queensland, NSW =  
116 New South Wales, Vic = Victoria and Tas = Tasmania.  
117

### 118 *Life history of southern bell frogs*

119 There are many experimentally derived data describing the life history of *L. raniformis*, with  
120 relationships established for most vital rates (survival, growth, reproduction, and  
121 recruitment). Eggs hatch two to four days after laying (Anstis 2002). The likelihood of hatch  
122 (as a proxy for egg survival rate) is between 0.933 and 1.000. This species ranges from north  
123 of latitude 35 °S to south of 45 °S, which spans a range of thermal conditions (from 32.9 °C  
124 maximum daily summer temperatures in the north of their range to 20.5 °C in the south).  
125 Being ectotherms, larval duration is strongly driven by temperature and as such, larval  
126 duration varies from 10–12 weeks in the north of their range to 12–15 months in the south  
127 (Anstis 2002). We used the larval duration of 70–80 days calculated at a constant water  
128 temperature of 23 °C (Cree 1984), approximately the average daily summer temperatures  
129 experienced in the study reach (which averages diurnal highs and nocturnal lows). We used  
130 the estimates of survival to metamorphosis generated for *Crinia signifera* (15–26% and 7–  
131 56%) (Williamson & Bull 1999), in the absence of species-specific estimates, these are the  
132 most-relevant estimates available.

133 Both sexes reach maturity in their first year (Heard, Scroggie & Malone 2012) and  
134 females breed annually (Anstis 2017) laying between 1885 and 3893 eggs each season  
135 (Humphries 1979). We used annual adult survival probability from the closely related *Litoria*  
136 *aurea* (mean = 0.2172, standard deviation = 0.087) (Pickett *et al.* 2016). These species are  
137 similar in size, appearance, and behaviour, although *L. aurea* occurs along a more northerly  
138 latitude than *L. raniformis*. Using lines of arrested growth in the shaft of the medial phalanx  
139 to determine age (skeletochronology), *L. raniformis* can survive into their fifth year (Mann *et*  
140 *al.* 2010) (G. Heard and A. Turner, Charles Sturt University, pers comm.).

141

142 *Demographic model*

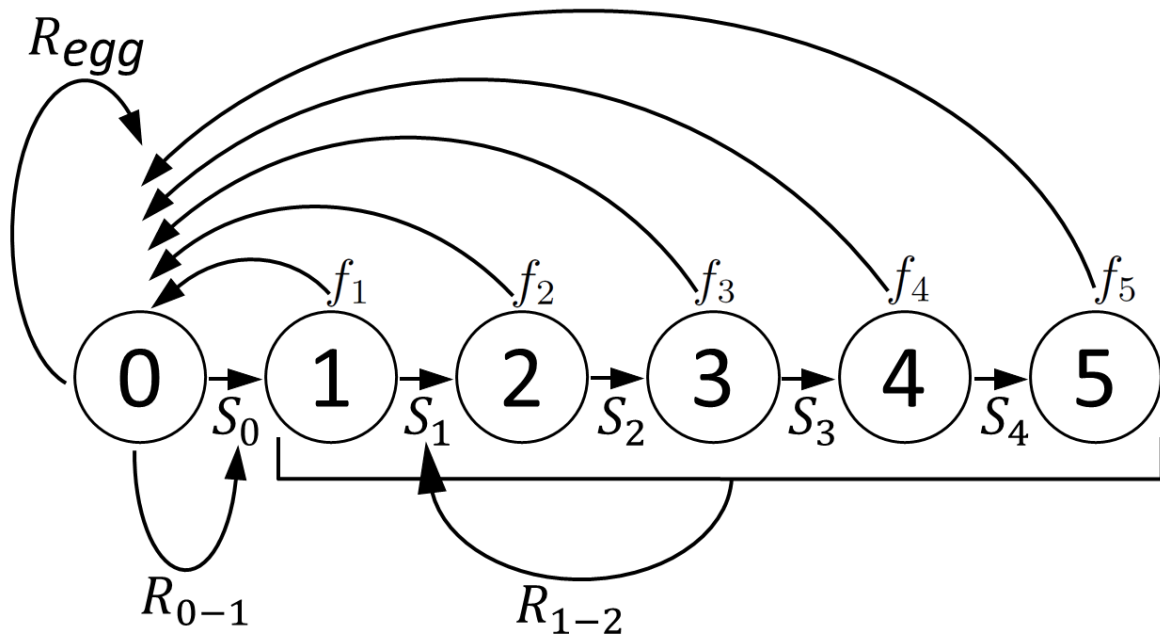

143

144 **Figure 2** *Litoria raniformis* can live into the fifth year. Compensatory density-feedback  
 145 reduction ( $R$ ) in annual survival probability ( $S$ ) and fertility ( $f$ ) are calculated from both  
 146 population and wetland size.

147

148 We constructed the model based on a lifecycle graph (**Figure 2**) and an age-classified  
 149 (Leslie) population model (Leslie 1945) that considers only females (**Figure S1**), where  $f$   
 150 represents fertility and  $S$  represents annual survival. Year 0 individuals do not breed and are  
 151 not assigned a fertility. We randomly resampled fertilities ( $f$ ) for age classes one to five years  
 152 from a normal distribution between 1885 and 3893 eggs (Humphries 1979), which we halved  
 153 to reflect the 50:50 sex ratio in this species.

154 We calculated survival  $S$  to the end of the first year as:

$$155 \quad S_0 = S_e * S_t * ((365 - (D_e + D_t)) * S_{ad}) \quad \text{[equation 2]}$$

156 where  $S_0$  is the probability of survival from 0 to 1 year old.  $S_e$  is the probability of hatch

157 (randomly resampled from a uniform distribution from 0.933–1.000).  $S_t$  is the probability of



158 survival to metamorphosis, which we randomly resampled from a  $\beta$  distribution with a mean  
159 = 0.26 and a standard deviation = 0.12 (Williamson and Bull 1999). We calculated the shape  
160 parameters  $\alpha$  and  $\beta$  of this distribution using:

$$161 \quad \alpha = m \frac{\mu(1-\mu)}{\sigma^2} \quad \text{[equation 3]}$$

$$162 \quad \beta = (1 - \mu) \left( \frac{m\mu(1-m\mu)}{\sigma^2} - 1 \right) \quad \text{[equation 4]}$$

163 where  $\mu$  is the mean and  $\sigma$  is the standard deviation of the  $\beta$  distribution.  $D_e$  is the duration of  
164 the egg stage (in days) resampled randomly from a uniform distribution between 2 and 4, and  
165  $D_t$  is the duration of the tadpole stage (in days) resampled randomly from a Normal  
166 distribution between 70 and 80 days.  $S_{ad}$  is the daily adult survival probability calculated as:

$$167 \quad S_{ad} = \sqrt[365]{S_a} \quad \text{[equation 5]}$$

168 where  $S_a$  is the annual probability of survival of an adult frog sampled from a  $\beta$  distribution  
169 with a mean = 0.2172 and a standard deviation = 0.087 (Pickett *et al.* 2016). We assigned  
170 frogs in their fifth year a survival = 0, reflecting senescence and death during their fifth year  
171 (although the model permits breeding before death).

172

### 173 *Population sizes*

174 We modelled *L. raniformis* populations at each of four wetland sizes (*small, medium, large,*  
175 *very large*). We derived these categories from typical wetlands in the region and the  
176 corresponding population size is an estimate of their respective carrying capacity. *Small*  
177 populations (~ 40 individuals) reflect the carrying capacity and population dynamics present  
178 in a wetland pool several metres in diameter. A *medium* population (~ 130 individuals)  
179 represents a wetland pool similar to 1–2 domestic swimming pools. A *large* population (~  
180 300 individuals) represents a wetland pool similar to an Olympic swimming pool, and a *very*  
181 *large* population (~ 1000 individuals) reflects a wetland several hundred metres in diameter.  
182 The starting population of adult females was calculated as 50% of these values (as *L.*

183 *raniformis* has a 50:50 sex ratio), being 20, 65, 150 and 500 female frogs, respectively. We  
184 assigned age classes for the starting female population by randomly resampling five adult  
185 survival values and then dividing the total number of females among the five age classes in  
186 these proportions. This created a more homogenous initial age structure than we might expect  
187 in a wild population. We managed this by ignoring the first 10 generations of each run as a  
188 ‘burn-in’ period, which allowed the model to stabilise to a stochastic expression of the stable-  
189 age distribution before analysis.

190 We allocated the initial number of eggs using an *a priori* number of spawning masses  
191 for each wetland size ( $n = 10, 30, 85, 150$ , respectively). We then stochastically resampled  
192 the number of eggs in each spawning mass (halved because the model only considers  
193 females). At these densities the *a priori* assignment of spawning masses did not impact  
194 population dynamics after burn-in.

195

### 196 *Compensatory density feedback*

197 To stabilise long-term population growth, we incorporated three compensatory density-  
198 feedback relationships. First, we corrected rates of egg laying to reflect the maximum  
199 carrying capacity ( $K_{\text{egg}}$ ) at each wetland. As the number of eggs approaches the wetland’s  
200 carrying capacity, eggs are reduced following an exponential decay function of the form:

$$201 \quad y = 1.01 - \left(x^{2+\frac{9}{x}}\right) \quad \text{[equation 6]}$$

202 and the rate of egg reduction follows the equation:

$$203 \quad R_{\text{egg}} = \int_0^{0.99} 1.01 - \left(K^{2+\frac{9}{K}}\right) d_K \quad \text{[equation 7]}$$

204 where  $R_{\text{egg}}$  is the total reduction in eggs laid at the wetland,  $K$  is the carrying capacity and  $d_K$   
205 is the differential  $K$  (carrying capacity) (**Figure S2**). Carrying capacity is calculated for each  
206 wetland size category using the initial number of *a priori* spawning masses laid (10, 30, 85 or

207 150) at the maximum fecundity for the species (3893 eggs), which we halved to consider only  
208 females. In this way, frogs lay without inhibition until the total egg count approaches the  
209 carrying capacity. The highest inhibition rate corresponds to 0.99 of the wetland's carrying  
210 capacity and all subsequent egg-laying events are reduced at this value (corresponding to a  
211 reduction of 0.0078).

212 The second compensatory density-feedback function used the total number of tadpoles  
213 present to reduce survival probabilities during the first year of life. This reflects predation and  
214 competition during larval life stages, and in the first few months post-metamorphosis. We  
215 calculated density feedback on survival probability using the function:

$$216 \quad R_{0-1} = (-0.241 + 1.54K)^{-0.855} \quad \text{[equation 8]}$$

217 where  $R_{0-1}$  is the reduction factor in survival for age class 0 individuals (**Figure S3**). Here,  
218 we assigned carrying capacity *a priori* based on the size of the wetland, *small* = 200 females,  
219 *medium* = 600 females, *large* = 1800 females and *very large* = 3000 females. Density  
220 feedback on survival from 0- to 1-year age classes is applied when the total adult population  
221 > 0.3 of the wetland's carrying capacity. We applied the highest reduction in survival at 2.1  
222 times carrying capacity that reduces survival probability to 0.0101 (Figure S3).

223 The third compensatory density-feedback function applies the abundance of all adult  
224 frogs to reduce survival from the 1- to 2-year age class ( $R_{1-2}$ ) to reflect competition for  
225 resources. The form of the relationship followed the method applied for ( $R_{0-1}$ ) presented  
226 above (equation 8, **Figure S3**).

227

### 228 *Modelling hydrology*

229 We considered two river-flow scenarios. The 'regulated flow' scenario is informed by the  
230 historical flow record immediately downstream of Lock 3 (A4260517;  
231 [waterconnect.sa.gov.au](http://waterconnect.sa.gov.au)). We used data starting in 1926, the year following the completion of

232 Lock 3. River levels above the operative range of this gauge ‘drown out’ the gauge, making  
233 measurements inaccurate. During these periods, we used data from station A4260528 (6.5 km  
234 downstream of Lock 3), which is unaffected by elevated river levels. This created a  
235 continuous daily record of flow rate between Locks 3 and 2 for 83 years. The second river-  
236 flow scenario is modelled ‘natural flow’, which covers the same time period, but in the  
237 absence of extraction or regulation in the catchment (see Murray-Darling Basin Authority-  
238 MDBA 2012a).

239 A second-order polynomial derives river heights from mean daily flow rate (MI day<sup>-1</sup>)  
240 for the two flow scenarios. Based on mean daily river height (metres with respect to  
241 Australian River Height Datum, mAHD) at site A4260517 and the flow records above, the  
242 following rating-curve equation:

$$243 \quad H = -2f^2 10^{-10} + 8f 10^{-5} + 6.0144 \quad \text{[equation 9]}$$

244 estimates river height, where  $H$  is river height (mAHD) and  $f$  is river flow (MI day<sup>-1</sup>). We  
245 used this to create a continuous daily river height for this reach over 83 years under natural  
246 and regulated flow.

247 Our model exposes wetland populations to one of two states each year. A ‘wet’ year is  
248 when the wetland received sufficient water to support frog reproduction and recruitment;  
249 conversely, during a ‘dry’ year, the wetland did not receive sufficient inputs to support frog  
250 recruitment (often filling and then drying prematurely — see definition below). There is a  
251 paucity of accurate sill-height (the river height at which a wetland begins to fill) data in the  
252 reach, so rather than modelling the inundation of specific wetlands, we calculated inundation  
253 of nine possible sill heights (7, 7.5, 8, 8.5, 9, 9.5, 10, 10.5 and 11 mAHD). Following  
254 discussion with local wetland managers, we used the rule that if mean daily river height is  $\geq$   
255 10 cm above sill height for  $\geq 10$  days during winter and spring, then the wetland is ‘wet’ and  
256 can support frog recruitment that year (K. Mason – Department for Environment and Water,

257 Adelaide, pers comm.). It is not necessary that these ten days be consecutive to fulfil this  
258 criterion. By using this criterion, we determined which of the nine sill heights were wet, and  
259 which were dry for each of the 83 years under the natural and regulated scenarios.

260

### 261 *Modelling flow scenarios*

262 We modelled 18 hydrological scenarios — these being sill heights of 7, 7.5, 8, 8.5, 9, 9.5, 10,  
263 10.5 and 11 mAHD each modelled under both natural- and regulated-flow conditions. To  
264 create stochastic expressions of these scenarios, we used the 83 years of daily river-height  
265 data for the flow scenario (natural or regulated flow) and classified each of those 83 years as  
266 either filling the nominated sill height ( $\geq 10$  non-consecutive days exceeding the sill height  
267 by  $\geq 10$  cm during the previous winter or spring) to create a wet year, or failing to fill the sill  
268 height sufficiently and creating a dry year (when recruitment is unsuccessful). Using this  
269 sequence of 83 wet and dry years (for each specific sill height and flow combination) we  
270 created a discrete-time Markov chain (e.g., Supporting Information 1) to resample unique,  
271 stochastic, 85-year wet/dry sequences for each model scenario run.

272 Finally, we modelled each of the four wetland sizes (*small, medium, large, very large*)  
273 at each of nine sill heights (7, 7.5, 8, 8.5, 9, 9.5, 10, 10.5 and 11 mAHD) and each of two  
274 flow scenarios (natural and regulated flow). We ran each of these 72 wetland models  
275 stochastically 10,000 times, each for 85 consecutive generations or until the population went  
276 extinct (creating a combined total of 61.2 million stochastic generations). This was sufficient  
277 to account for wetland variability in the study reach. We disregarded the first ten burn-in  
278 generations of each model and used generations 11 to 85 (or to extinction) in our analyses.

279 For each model, we recorded the sequence of wet and dry years from generations 11 to  
280 85 (or extinction). For each occurrence of two or more consecutive dry years, we recorded  
281 the number of consecutive dry years and whether it resulted in extinction. We organised these

282 data by the average frequency of dry years at the wetland and calculated the probability of  
283 extinction for two to five consecutive dry years, noting that six consecutive dry years exceeds  
284 the maximum reproductive lifespan of the species.

285 To examine the effect of maximum lifespan on the model, we ran a univariate  
286 sensitivity analysis on a single wetland model with senescence constrained to ages two, three,  
287 four and five years (Supplementary Information 1).

288

## 289 Results

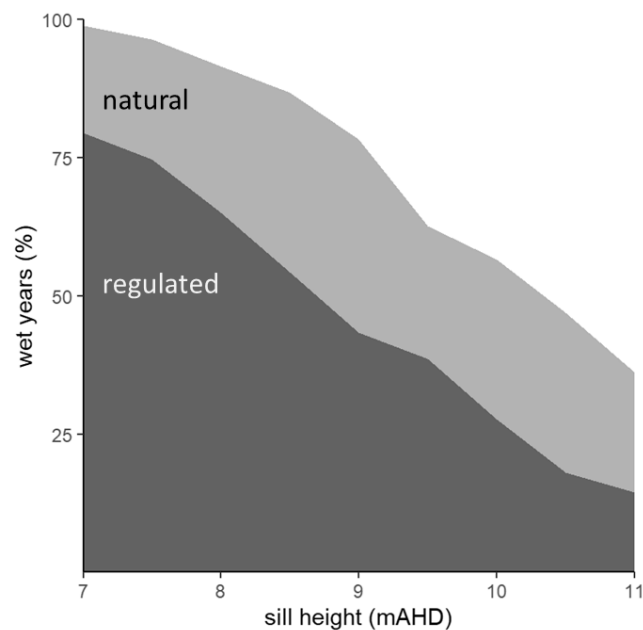

290

291 **Figure 3.** Proportion of the 83 years of observed river height (regulated) and modelled  
292 natural river height that potentially supported *L. raniformis* breeding (wet years) at sill  
293 heights from 7 to 11 mAHD.

294

295 *‘Wetness’ of wetlands under natural- and regulated-flow conditions*

296 River regulation reduced the frequency of wet years by 19–34% compared to the natural-flow  
297 scenario for the same 83-year period (**Figure 3**). This equates to a reduction of wet years by

298 19.5% at 7 mAHD, up to 60% at 11 mAHD. This changed both the proportions and pattern of  
299 wet and dry years. Regulation increased the mean duration of successive dry years at all sill  
300 heights (**Figure 4**). Under natural conditions the mean duration of dry years did not exceed  
301 two years at any of the sill heights examined, whereas the regulated-flow scenario resulted in  
302 mean duration of dry events approaching the maximum lifespan of the species at sill heights  
303  $\geq 10$  mAHD. Under natural conditions the maximum duration of dry events did not exceed  
304 the maximum reproductive lifespan of the species, except at a sill heights  $> 10$  mAHD. The  
305 maximum duration of dry events observed under river regulation exceeded the maximum  
306 reproductive lifespan of this species at every sill height examined.

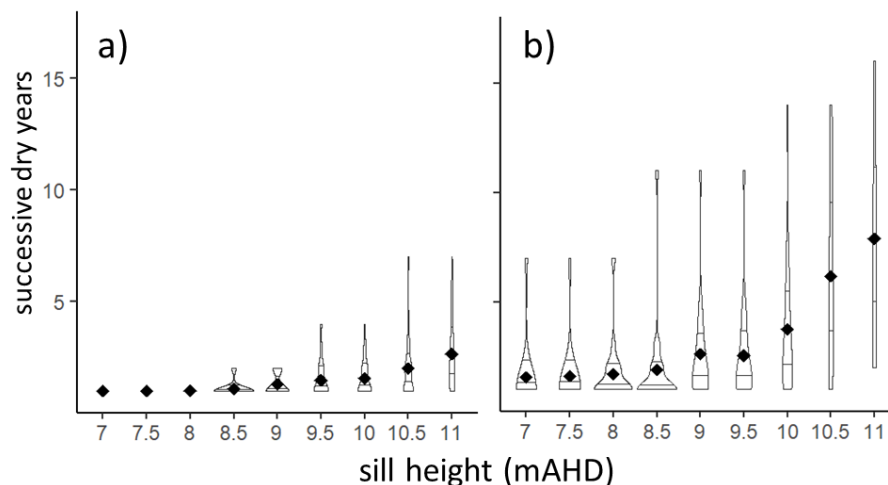

307

308 **Figure 4** Comparison of wetland inundation pattern over 83 years of observed data under a)  
309 natural flow regime and b) river regulation. Sill heights are presented in metres with respect  
310 to Australian River Height Datum (mAHD). The maximum duration of dry years exceeds the  
311 maximum reproductive lifespan of *Litoria raniformis* under all regulated sill height wetlands.

312

### 313 *Extinction probability of each wetland scenario*

314 Under the natural-flow scenario, the probability of extinction — Pr(Ext) — during the 85  
315 modelled years was  $\sim 0$  at sill heights  $\leq 8.5$  mAHD (**Figure 5**). Conversely, all wetland sizes  
316 reached Pr(Ext) = 1 at sill heights  $\geq 9$  mAHD when flows were regulated. Thus, wetlands that  
317 historically supported *L. raniformis* populations under natural-flow conditions (i.e.,  $\leq 8.5$

318 mAHD) are unreliable under river regulation. Without intervention, wetlands with sill height  
319 of  $\geq 9$  mAHD will not sustain *L. raniformis* populations under existing flow conditions.

320 The probabilities of extinction in *very large* wetlands were 0.25 to 0.70 lower than  
321 those in *small* wetlands (**Figure 6**). This effect was more pronounced in the regulated-flow  
322 scenario than under natural-flow conditions.

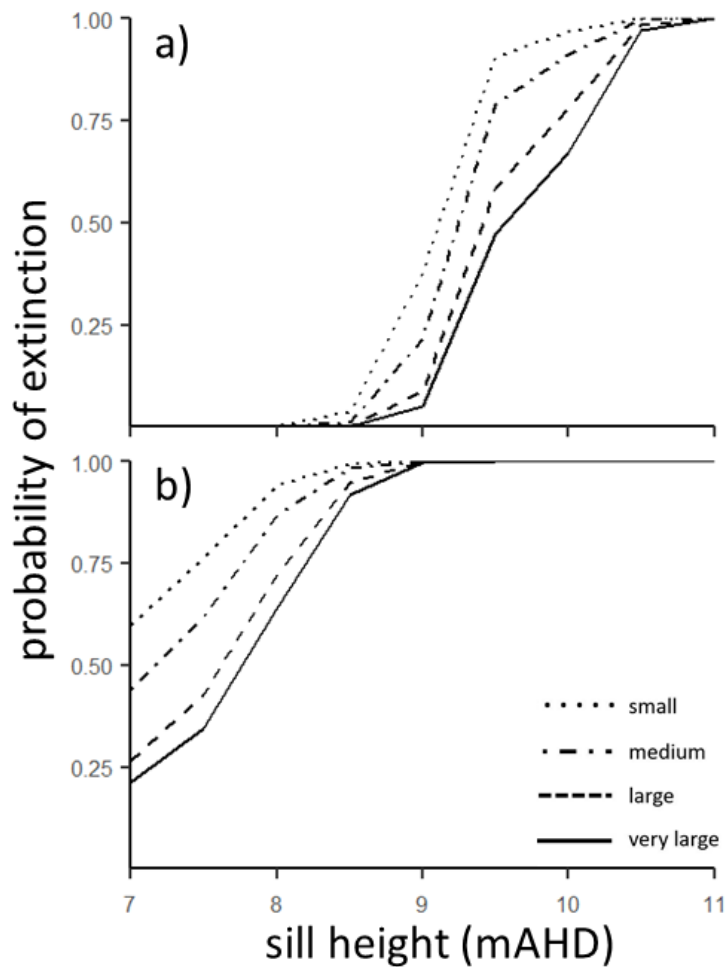

323

324 **Figure 5** The probability of extinction at four wetland sizes under a) natural-flow and b)  
325 regulated-flow conditions. River regulation has increased the extinction probability of *Litoria*



326 *raniformis* populations through most of their former habitats. These effects are strongest at  
327 smaller wetlands.

328

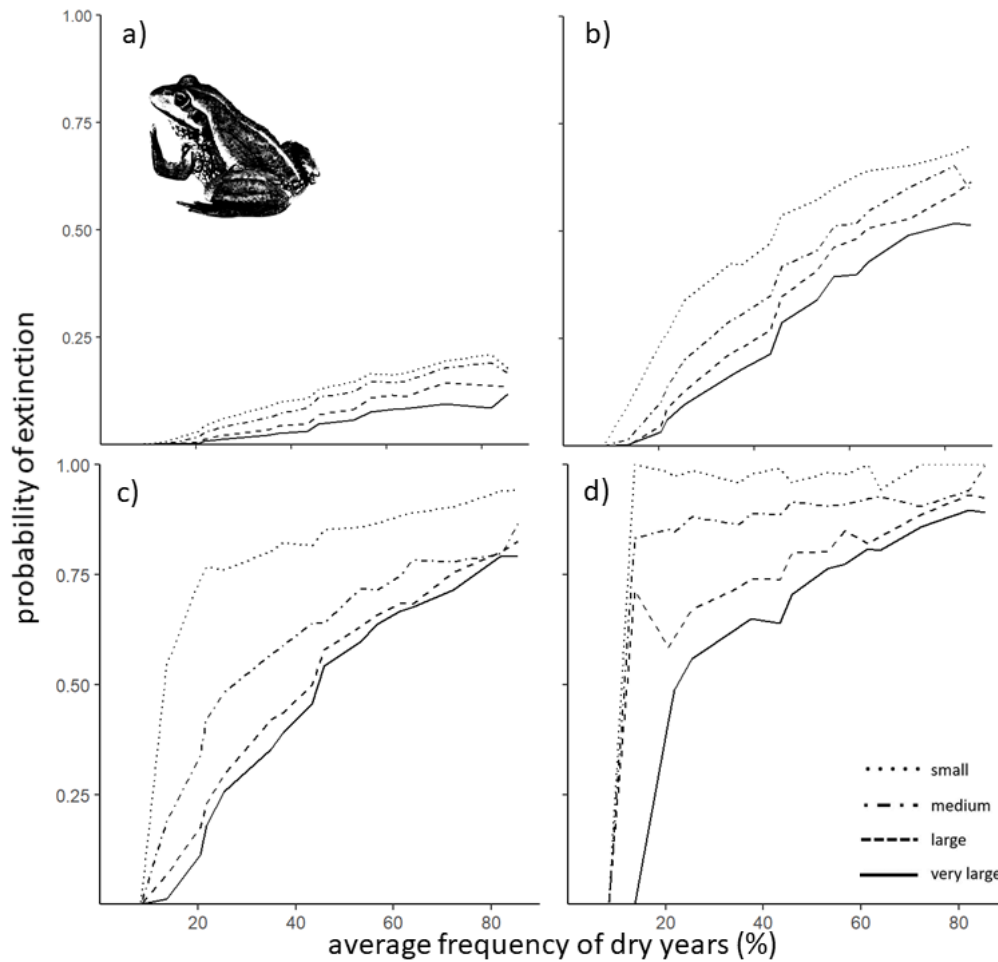

329

330 **Figure 6** Successive dry years increase the probability of extinction and this effect increases  
331 with: increasing dry duration, decreasing wetland size, and increased average frequency of  
332 dry years at the wetland. Plots are a) 2 successive dry years, b) 3 successive dry years, c) 4  
333 successive dry years and d) 5 successive dry years.

334

335 Two consecutive dry years resulted in  $\text{Pr}(\text{Ext}) < 0.25$  in all treatments, including wetlands

336 with an 80% average frequency of dry years (**Figure 6**). Increasing the number of

337 consecutive dry years increases  $\text{Pr}(\text{Ext})$  up to five consecutive dry years, which gives  $\text{Pr}(\text{Ext})$

338  $> 0.5$  in all treatments except for *very large* populations with an average frequency of dry

339 years  $< 20\%$ . Smaller wetlands had increased extinction probability in all instances and the

340 disparity between wetland sizes became more pronounced with increasing successive dry  
341 years. The average frequency of dry years at the wetland strongly influences the capacity to  
342 survive extended dry periods. Wetter sites have lower extinction probability than drier sites  
343 for each drought duration.

344

## 345 **Discussion**

346 Regulation and abstraction of flow in the Murray-Darling catchment has resulted in wetlands  
347 that fill less often (**Figure 3**). The average duration of successive dry years has increased by  
348 up to three years compared to natural flow conditions (**Figure 4**) (Maheshwari, Walker &  
349 McMahon 1995; Bice *et al.* 2017). For species that rely on floodplain inundation to complete  
350 their lifecycle, dry years result in reproductive failure. This is not uncommon in amphibians,  
351 especially in species that breed in ephemeral waterbodies (which can dry before completion  
352 of larval life stages). In isolation, reproductive failure causes population fluctuation, but do  
353 not always appreciably increase the probability of local extinction (Taylor, Scott & Gibbons  
354 2006), albeit with simplification of age structure and attrition of adult populations. However,  
355 successive failures increase extinction risk, especially in short-lived species (Semlitsch *et al.*  
356 1996). Without the capacity to extend lifespan through unfavourable periods (i.e.,  
357 aestivation), droughts equalling or exceeding the reproductive lifespan of a species result in  
358 local extinction, a process that is likely to have driven the local extinctions in 42% of  
359 breeding sites of *Pseudophryne pengilleyi* in Kosciuszko and Brindabella National Parks in  
360 New South Wales, Australia (Scheele *et al.* 2012).

361

### 362 *Drought and the decline of Litoria raniformis*

363 The flow record that informs our model includes a severe drought from 1996 to 2009. During  
364 this time, south-eastern Australia experienced a region-wide reduction in rainfall and runoff,

365 below-average streamflow, and critical water shortages (Heberger 2011; van Dijk *et al.*  
366 2013). This event, coupled with ongoing water extraction, resulted in seven or more  
367 successive dry years at all sill heights  $\geq 7$  mAHD in this reach (**Figure 4**). The persistence of  
368 some few *L. raniformis* through this period is probably a combination of breeding in the river  
369 channel, the maintenance of some wetlands with environmental water, and recolonisation  
370 with the return of flow in 2010 (Fonte, Mayer & Lötters 2019). The drought devastated *L.*  
371 *raniformis* populations in the reach, but modelled natural flow for the same period indicates  
372 that the maximum number of successive dry years would not have exceeded four years in  
373 wetlands up to 10 mAHD (**Figure 4**). For *L. raniformis* that can breed in its fifth year, all  
374 wetlands  $< 10$  mAHD could have survived this perturbation.

375 *Litoria raniformis* was common throughout south-eastern Australia (Pyke 2002), but is  
376 declining across its range (Osborne, Littlejohn & Thomson 1996; Ashworth 1998; Wassens *et*  
377 *al.* 2010, Mason 2013). Proposed threatening processes are habitat loss, barriers to  
378 movement, disease, predation by exotic fishes, biocides, and increases in ultraviolet B  
379 radiation (Clemann & Gillespie 2012). Our results support our hypothesis that reduced  
380 wetland inundation is driving population decline in this reach. Although this is reach-specific,  
381 similar reductions in inundation are present elsewhere in the catchment and in other  
382 catchments with declining *L. raniformis* populations. The link between river regulation and  
383 increased extinction probability could be applicable at wetlands outside of this reach.

384

#### 385 *Model assumptions*

386 Our model makes two main assumptions: that *L. raniformis* breed in their fifth year before  
387 senescence, and there is no population exchange between wetlands. Our single-parameter  
388 perturbation (sensitivity) analysis of maximum age (**Supplementary Information 1**) shows  
389 little influence of maximum age on extinction probability. This is likely because the

390 demography of this species favours younger age classes. Reducing the maximum age of the  
391 species does, however, reduce the maximum drought length before local extinction. If the  
392 lifespan of *L. raniformis* in this system is lower than five years, then our outputs can be used  
393 to triage environmental water provision to minimise the probability of local extinction.  
394 However, when successive breeding failures meet the local maximum age, the population  
395 will be lost regardless.

396       The second potential limitation of the model is that virtual wetlands exist in isolation  
397 without immigration or emigration. As such, modelled local extinctions are an endpoint after  
398 which recolonisation cannot occur. Amphibians are physiologically dependent on moist  
399 environments, have relatively poor dispersal capacity (compared to other tetrapods), and can  
400 show strong site fidelity, and these traits suggest limited capacity for recolonisation  
401 (Blaustein, Wake & Sousa 1994). Despite limited dispersal, amphibians are frequently  
402 thought to exist in metapopulations (Levins 1969; Smith & Green 2005). We propose that *L.*  
403 *raniformis* in this system meets the four characteristics of a metapopulation (Hanski *et al.*  
404 1995): (i) habitat patches support local breeding populations, (ii) no single population is large  
405 enough to ensure long-term survival, (iii) patches are not too isolated to prevent  
406 recolonisation, and (iv) local dynamics are sufficiently asynchronous to make simultaneous  
407 extinction of all local populations unlikely. Despite the semi-arid/arid climate, *L. raniformis*  
408 can move hundreds of metres in a single night and can colonise over distances of 500 m  
409 (Herbert 2000; Department for Environment and Heritage, 2004; Wassens *et al.* 2008). We  
410 anticipate that movement between favourable patches is critical to the persistence of this  
411 species.

412       Nevertheless, our model informs the conservation of fragmented amphibian populations  
413 with high resistance to dispersal. As a cautionary approach, our model considers the  
414 population dynamics of isolated wetlands given that these have higher extinction probabilities

415 than wetlands within in a network. We anticipate that populations in close proximity will  
416 have lower extinction probabilities than we predict here due to the stabilising effects of  
417 metapopulation structure and the rescue effect (Brown & Kodric-Brown, 1977), but we urge  
418 a cautionary approach to managing this species, triaging water delivery as though all wetland  
419 populations exist in isolation.

420

#### 421 *Environmental water provision*

422 In highly regulated catchments, restoring large-scale historic inundation patterns is neither  
423 possible nor desirable. However, providing specific reaches and wetlands with environmental  
424 water can recreate critical components of historic flow regimes. The assumption is that  
425 reconstructing specific components of ‘natural’ flow, can maintain key ecosystem processes  
426 through the timely, sequential ecological cues inherent in ‘natural’ flow (Poff *et al.* 1997). In  
427 highly modified and non-stationary conditions, a more mechanistic understanding of  
428 environmental water requirements is valuable (Poff 2018). An alternative approach uses  
429 thresholds of inundation frequency, and in turn extinction probability to prioritise the delivery  
430 of ‘designer’ flow. When well-designed, this approach generates efficiencies in the volumes  
431 of water delivered while still eliciting the desired ecological response (in this case, a  
432 reduction in the probability of extinction for target amphibian populations).

433 Our model shows that water deliveries maintaining no more than one sequential dry  
434 year will support *L. raniformis* (**Figure 6**). For wetlands with low extinction probability, or  
435 when environmental water budgets are limiting, water provision to ensure no more than two  
436 successive dry years will maintain extinction risk  $< 0.25$  in all wetland sizes. Using this  
437 approach, a rotating roster of wetlands could be watered to offset individual wetland risk,  
438 noting that local extinctions will likely rely on dispersal from neighbouring wetlands to re-  
439 establish. The highest priorities for intervention are wetlands that have experienced four or

440 five years without recruitment and where *L. raniformis* is still present (**Figure 6**). These  
441 populations should be watered during the next breeding season to reduce the probability of  
442 local extinction. These priorities are not intended to be cycled in perpetuity, especially in  
443 situations where extinction risk is high. For example, a wetland with a 50% extinction  
444 probability after five dry years could require several favourable years to recover before it  
445 could be expected to persist through a second five-year drought.

446 Our model also makes three main assumptions regarding wet years that will influence  
447 environmental water delivery: that 1. wetlands support adult frogs between breeding seasons,  
448 2. breeding occurs during each wet year, and 3. wet years do not accumulate fish and  
449 crustacean predators. Water delivery should be tailored to meet these assumptions, including  
450 maintaining small summer pools to support adult frogs during dry years, watering to support  
451 components of the vegetation community that are important for breeding, and periodic drying  
452 to reduce predator densities.

453 Legality and morality of prioritisation notwithstanding, our approach informs  
454 thresholds for environmental water provision that could be applied where demographic data  
455 are available and where a clear relationship exists between intervention and recruitment —  
456 for example, the delivery of water to extend hydroperiod in *Rana sevosa* (Seigel, Dinsmore &  
457 Richter 2006) or *P. pengilleyi* (Scheele *et al.* 2012). This approach is not specific to  
458 amphibians, nor to environmental water provision, and can also be applied where episodic  
459 events are directly linked to reproductive outcomes, such as fire intermittency and  
460 germination in pyrophytic plants, or suprasedasonal flooding events in arid-zone seed  
461 germination.

462

463 *Legislative protections*

464 The protection of threatened amphibians is mandated under Australian law (*Environment*  
465 *Protection and Biodiversity Conservation Act, 1999*), but the primary legislation to manage  
466 environmental water in the Murray-Darling catchment considers fish, birds, and vegetation,  
467 but not amphibians (MDBA, 2012b). This is mirrored internationally where a review of 30  
468 European environmental flow programmes does not mention amphibians (European  
469 Commission 2016). Given the worsening state of amphibian populations globally, we  
470 advocate for future legislative revisions to include provisions specifically for amphibians.

471

#### 472 ***Author contributions***

473 R.M., C.J.A.B. and M.G. designed the modelling approach. All authors contributed to the  
474 manuscript.

475

#### 476 ***Acknowledgements***

477 We thank the Murraylands and Riverland Landscapes Board and the Nature Foundation SA  
478 for their generous support and the Murray-Darling Basin Authority for providing time-series  
479 data of natural flow. We bring together land managers, conservation organisations, and  
480 scientists from the catchment and we have consulted with amphibian and environmental  
481 water specialists from across Australia.

482

#### 483 ***Data Availability Statement***

484 Data and code available from:  
485 [https://github.com/RupertLovesEcology/RiverRegulation\\_Frog\\_PopModel](https://github.com/RupertLovesEcology/RiverRegulation_Frog_PopModel)

486

#### 487 ***References***

509 Anstis, M. (2002) *Tadpoles of south-eastern Australia*. New Holland.  
510 Anstis, M. (2017) *Tadpoles and frogs of Australia*. New Holland Publishers Pty Limited.  
511 Ashworth, J.M. (1998) An appraisal of the conservation status of *Litoria raniformis* (Kefferstein) in  
512 Tasmania. PhD Thesis, University of Tasmania.  
513 Bice, C.M., Gibbs, M.S., Kilsby, N.N., Mallen-Cooper, M. & Zampatti, B.P. (2017) Putting the  
514 “river” back into the Lower River Murray: quantifying the hydraulic impact of river



- 515 regulation to guide ecological restoration. *Transactions of the Royal Society of South*  
516 *Australia*, **141**, 108-131.
- 517 Bishop-Taylor, R., Tulbure, M.G. & Broich, M. (2015) Surface water network structure, landscape  
518 resistance to movement and flooding vital for maintaining ecological connectivity across  
519 Australia's largest river basin. *Landscape Ecology*, **30**, 2045-2065.
- 520 Blaustein, A.R. & Wake, D.B. (1990) Declining amphibian populations: a global phenomenon?  
521 Elsevier Current Trends.
- 522 Blaustein, A.R., Wake, D.B. & Sousa, W.P. (1994) Amphibian declines: judging stability, persistence,  
523 and susceptibility of populations to local and global extinctions. *Conservation Biology*, **8**, 60-  
524 71.
- 525 Brown, J.H. & Kodric-Brown, A. (1977) Turnover Rates in Insular Biogeography: Effect of  
526 Immigration on Extinction. *Ecology*, **58**, 445-449.
- 527 Castello, L. & Macedo, M.N. (2016) Large-scale degradation of Amazonian freshwater ecosystems.  
528 *Global Change Biology*, **22**, 990-1007.
- 529 Clemann, N. & Gillespie, G.R. (2012) National Recovery Plan for the Southern Bell Frog *Litoria*  
530 *raniformis*. Department of Sustainability and Environment, Melbourne.
- 531 European Commission D.-G.f.t.E.E. (2016) Ecological flows in the implementation of the Water  
532 Framework Directive Compilation of case studies referenced in CIS guidance document n°31.
- 533 Cree, A. (1984) Breeding biology, respiration, and larval development of two introduced frogs  
534 (*Litoria raniformis* and *L. ewingi*). *New Zealand Journal of Zoology*, **11**, 179-187.
- 535 CSIRO (2008) Water availability in the Murray-Darling Basin. Summary of a report to the Australian  
536 Government from the CSIRO Murray-Darling Basin Sustainable Yields Project. CSIRO,  
537 Australia.
- 538 Docker, B. & Robinson, I. (2014) Environmental water management in Australia: experience from the  
539 Murray-Darling Basin. *International Journal of Water Resources Development*, **30**, 164-177.
- 540 Fonte, L.F.M.d., Mayer, M. & Lötters, S. (2019) Long-distance dispersal in amphibians. *Frontiers of*  
541 *Biogeography*, **11**.
- 542 Gell, P. & Reid, M. (2014) Assessing change in floodplain wetland condition in the Murray-Darling  
543 Basin, Australia. *Anthropocene*, **8**, 39-45.
- 544 Grant, E.H.C., Miller, D.A. & Muths, E. (2020) A Synthesis of Evidence of Drivers of Amphibian  
545 Declines. *Herpetologica*.
- 546 Greenwood, O., Mossman, H.L., Suggitt, A.J., Curtis, R.J. & Maclean, I.M.D. (2016) Using *in situ*  
547 management to conserve biodiversity under climate change. *Journal of Applied Ecology*, **53**,  
548 885-894.
- 549 Griffiths, R.A. & Pavajeau, L. (2008) Captive breeding, reintroduction, and the conservation of  
550 amphibians. *Conservation Biology*, **22**, 852-861.
- 551 Hanski, I., Pakkala, T., Kuussaari, M. & Lei, G. (1995) Metapopulation persistence of an endangered  
552 butterfly in a fragmented landscape. *Oikos*, 21-28.
- 553 Heard, G.W., Scroggie, M.P. & Malone, B.S. (2012) The life history and decline of the threatened  
554 Australian frog, *Litoria raniformis*. *Austral Ecology*, **37**, 276-284.
- 555 Heberger, M. (2011) Australia's Millennium Drought: Impacts and Responses. *The World's Water:*  
556 *The Biennial Report on Freshwater Resources* (ed. P.H. Gleick), pp. 97-125. Island  
557 Press/Center for Resource Economics, Washington, DC.
- 558 Herbert, T. (2000) Frogs of the Loveday Wetland Complex (River Murray, South Australia): Species  
559 Inventory and Observations on Abundance and Habitat Preferences. Final Report, prepared  
560 for the Barmera-Moorook Field and Game Association. Barmera, South Australia.
- 561 Department for Environment and Heritage (2004) Lake Littra Draft Management Plan. Department  
562 for Environment and Heritage, Berri, South Australia.
- 563 Hof, C., Araújo, M.B., Jetz, W. & Rahbek, C. (2011) Additive threats from pathogens, climate and  
564 land-use change for global amphibian diversity. *Nature*, **480**, 516.
- 565 Humphries, R.B. (1979) Dynamics of a breeding frog community. Ph.D, Australian National  
566 University.
- 567 IUCN (2020) The IUCN Red List of Threatened Species. Version 2020-3.  
568 <https://www.iucnredlist.org>. Downloaded on [13 March 2021].



- 569 Kennen, J.G., Stein, E.D. & Webb, J.A. (2018) Evaluating and managing environmental water  
570 regimes in a water-scarce and uncertain future. *Freshwater Biology*, **63**, 733-737.
- 571 Leslie, P.H. (1945) On the use of matrices in certain population mathematics. *Biometrika*, **33**, 183-  
572 212.
- 573 Levins, R. (1969) Some demographic and genetic consequences of environmental heterogeneity for  
574 biological control. *American Entomologist*, **15**, 237-240.
- 575 Maheshwari, B.L., Walker, K.F. & McMahon, T.A. (1995) Effects of regulation on the flow regime of  
576 the River Murray, Australia. *Regulated Rivers: Research & Management*, **10**, 15-38.
- 577 Mann, R.M., Hyne, R.V., Selvakumaraswamy, P. & Barbosa, S.S. (2010) Longevity and larval  
578 development among southern bell frogs (*Litoria raniformis*) in the Coleambally Irrigation  
579 Area-implications for conservation of an endangered frog. *Wildlife Research*, **37**, 447-455.
- 580 Mason, K. 2013, Frog Monitoring in the Coorong, Lower Lakes and Murray Mouth Region 2012/13,  
581 Department of Environment, Water and Natural Resources, Murray Bridge, South Australia.
- 582 Mathwin, R., Wassens, S., Young, J., Ye, Q. & Bradshaw, C.J. (2021) Manipulating water for  
583 amphibian conservation. *Conservation Biology* **35**, 24-34.
- 584 McMenamin, S.K., Hadly, E.A. & Wright, C.K. (2008) Climatic change and wetland desiccation  
585 cause amphibian decline in Yellowstone National Park. *Proceedings of the National Academy  
586 of Sciences*, **105**, 16988-16993.
- 587 Miller, D.A.W., Grant, E.H.C., Muths, E., Amburgey, S.M., Adams, M.J., Joseph, M.B., Waddle,  
588 J.H., Johnson, P.T.J., Ryan, M.E., Schmidt, B.R., Calhoun, D.L., Davis, C.L., Fisher, R.N.,  
589 Green, D.M., Hossack, B.R., Rittenhouse, T.A.G., Walls, S.C., Bailey, L.L., Cruickshank,  
590 S.S., Fellers, G.M., Gorman, T.A., Haas, C.A., Hughson, W., Pilliod, D.S., Price, S.J., Ray,  
591 A.M., Sadinski, W., Saenz, D., Barichivich, W.J., Brand, A., Brehme, C.S., Dagit, R.,  
592 Delaney, K.S., Glorioso, B.M., Kats, L.B., Kleeman, P.M., Pearl, C.A., Rochester, C.J., Riley,  
593 S.P.D., Roth, M. & Sigafus, B.H. (2018) Quantifying climate sensitivity and climate-driven  
594 change in North American amphibian communities. *Nature Communications*, **9**, 3926.
- 595 Murray-Darling Basin Authority (2012a) Hydrologic modelling to inform the proposed Basin Plan-  
596 methods and results., MDBA publication no: 17/12, Murray-Darling Basin Authority,  
597 Canberra.
- 598 Murray-Darling Basin Authority (2012b) Murray-Darling Basin Plan Compilation No. 6. Murray-  
599 Darling Basin Authority, Canberra, Australia. Available at  
600 <https://www.legislation.gov.au/Details/F2018C00451> [Accessed 13 March 2021].
- 601 Narins, P.M. & Meenderink, S.W. (2014) Climate change and frog calls: long-term correlations along  
602 a tropical altitudinal gradient. *Proceedings of the Royal Society B: Biological Sciences*, **281**,  
603 20140401.
- 604 Newbold, T. (2018) Future effects of climate and land-use change on terrestrial vertebrate community  
605 diversity under different scenarios. *Proceedings of the Royal Society B: Biological Sciences*,  
606 **285**, 20180792.
- 607 Osborne, W.S., Littlejohn, M.J. & Thomson, S.A. (1996) Former distribution and apparent  
608 disappearance of the *Litoria aurea* complex from the Southern Tablelands of New South  
609 Wales and the Australian Capital Territory. *Australian Zoologist*, **30**, 190-198.
- 610 Pickett, E.J., Stockwell, M.P., Clulow, J. & Mahony, M.J. (2016) Modelling the population viability  
611 of a threatened amphibian with a fast life-history. *Aquatic Conservation: Marine and  
612 Freshwater Ecosystems*, **26**, 9-19.
- 613 Poff, N.L. (2018) Beyond the natural flow regime? Broadening the hydro-ecological foundation to  
614 meet environmental flows challenges in a non-stationary world. *Freshwater Biology*, **63**,  
615 1011-1021.
- 616 Poff, N.L., Allan, J.D., Bain, M.B., Karr, J.R., Prestegard, K.L., Richter, B.D., Sparks, R.E. &  
617 Stromberg, J.C. (1997) The Natural Flow Regime. *BioScience*, **47**, 769-784.
- 618 Pyke, G. (2002) A review of the biology of the Southern Bell Frog *Litoria raniformis*  
619 (*Anura:Hylidae*). *Australian Zoologist*, **32**, 32-48.
- 620 Scheele, B., Driscoll, D., Fischer, J. & Hunter, D. (2012) Decline of an endangered amphibian during  
621 an extreme climatic event. *Ecosphere*, **3**, 1-15.

- 622 Seigel, R.A., Dinsmore, A. & Richter, S.C. (2006) Using Well Water to Increase Hydroperiod as a  
623 Management Option for Pond-Breeding Amphibians. *Wildlife Society Bulletin (1973-2006)*,  
624 **34**, 1022-1027.
- 625 Semlitsch, R.D., Scott, D., Pechmann, J. & Gibbons, J. (1996) Structure and dynamics of an  
626 amphibian community. *Long-term studies of vertebrate communities*, 217-248.
- 627 Shoo, L.P., Olson, D.H., McMennamin, S.K., Murray, K.A., Van Sluys, M., Donnelly, M.A., Stratford,  
628 D., Terhivuo, J., Merino-Viteri, A., Herbert, S.M., Bishop, P.J., Corn, P.S., Dovey, L.,  
629 Griffiths, R.A., Lowe, K., Mahony, M., McCallum, H., Shuker, J.D., Simpkins, C., Skerratt,  
630 L.F., Williams, S.E. & Hero, J.-M. (2011) Engineering a future for amphibians under climate  
631 change. *Journal of Applied Ecology*, **48**, 487-492.
- 632 Smith, M.A. & Green, D.M. (2005) Dispersal and the metapopulation paradigm in amphibian ecology  
633 and conservation: are all amphibian populations metapopulations? *Ecography*, **28**, 110-128.
- 634 Smith R.K, Meredith H, & Sutherland W.J. (2019) Amphibian conservation. Pages 9–66 in  
635 Sutherland WJ, Dicks LV, Ockenden N, Petrovan SO, Smith RK, editors. What works in  
636 conservation 2019. Open Book Publishers, Cambridge, United Kingdom
- 637 Stuart, S.N., Chanson, J.S., Cox, N.A., Young, B.E., Rodrigues, A.S., Fischman, D.L. & Waller, R.W.  
638 (2004) Status and trends of amphibian declines and extinctions worldwide. *Science*, **306**,  
639 1783-1786.
- 640 Taylor, B.E., Scott, D.E. & Gibbons, J.W. (2006) Catastrophic reproductive failure, terrestrial  
641 survival, and persistence of the marbled salamander. *Conservation Biology*, **20**, 792-801.
- 642 van Dijk, A.I., Beck, H.E., Crosbie, R.S., de Jeu, R.A., Liu, Y.Y., Podger, G.M., Timbal, B. & Viney,  
643 N.R. (2013) The Millennium Drought in southeast Australia (2001–2009): Natural and human  
644 causes and implications for water resources, ecosystems, economy, and society. *Water  
645 Resources Research*, **49**, 1040-1057.
- 646 Wassens, S., Hall, A., Osbourne, W. & Watts, R.J. (2010) Habitat characteristics predict occupancy  
647 patterns of the endangered amphibian *Litoria raniformis* in flow-regulated flood plain  
648 wetlands. *Austral Ecology*, **35**, 944-955.
- 649 Wassens, S. & Maher, M. (2011) River regulation influences the composition and distribution of  
650 inland frog communities. *River Research and Applications*, **27**, 238-246.
- 651 Wassens, S., Watts, R.J., Jansen, A. & Roshier, D. (2008) Movement patterns of southern bell frogs  
652 (*Litoria raniformis*) in response to flooding. *Wildlife Research*, **35**, 50-58.
- 653 Williamson, I. & Bull, C.M. (1999) Population ecology of the Australian frog *Crinia signifera*: larvae.  
654 *Wildlife Research*, **26**, 81-99.

655

## 656 **Supporting Information**

657 Additional Supporting Information may be found in the online version of this article.

658 **Supporting Information 1.** To examine the effects of maximum lifespan on the predicted  
659 probability of extinction, we applied a single-parameter perturbation (sensitivity) analysis on  
660 a single modelled scenario (a large wetland with a sill height of 7.5 metres with respect to the  
661 Australian Height Datum (mAHD) under a river regulation flow scenario).

662

663 **Figure S1.** The Leslie matrix (L1) assigns fertility to age classes 1 – 5 in the top row and age-  
664 specific annual survival probability on the sub-diagonal.

665

666 **Figure S2.** Inhibition of egg laying at a wetland follows an exponential decay function. If the  
667 total number of eggs laid is greater than 0.8 of the wetland's carrying capacity, subsequent  
668 eggs are reduced at an increasing rate.

669

670 **Figure S3.** Compensatory density feedback on survival rate of eggs to the 1-year age class  
671 and survival of the 1-year age class to the 2-year age class based on an exponential decay  
672 function. Reduction of survival probability starts when the population exceeds 0.3 of carrying  
673 capacity.

674

675

676
